# Supplementary material for: Electrocardiographic Manifestations and Targeted Management of Cardiac Complications in Cardiac-involved DLBCL: A Retrospective Case Series
Source: Research Square preprint supplement (doi:10.21203/rs.3.rs-7412966/v1), 2025-09-22

**Table 1**: Clinical Characteristics, Electrocardiographic Findings, and Outcomes in Five Cases of Cardiac-Involved Diffuse Large B-Cell Lymphoma


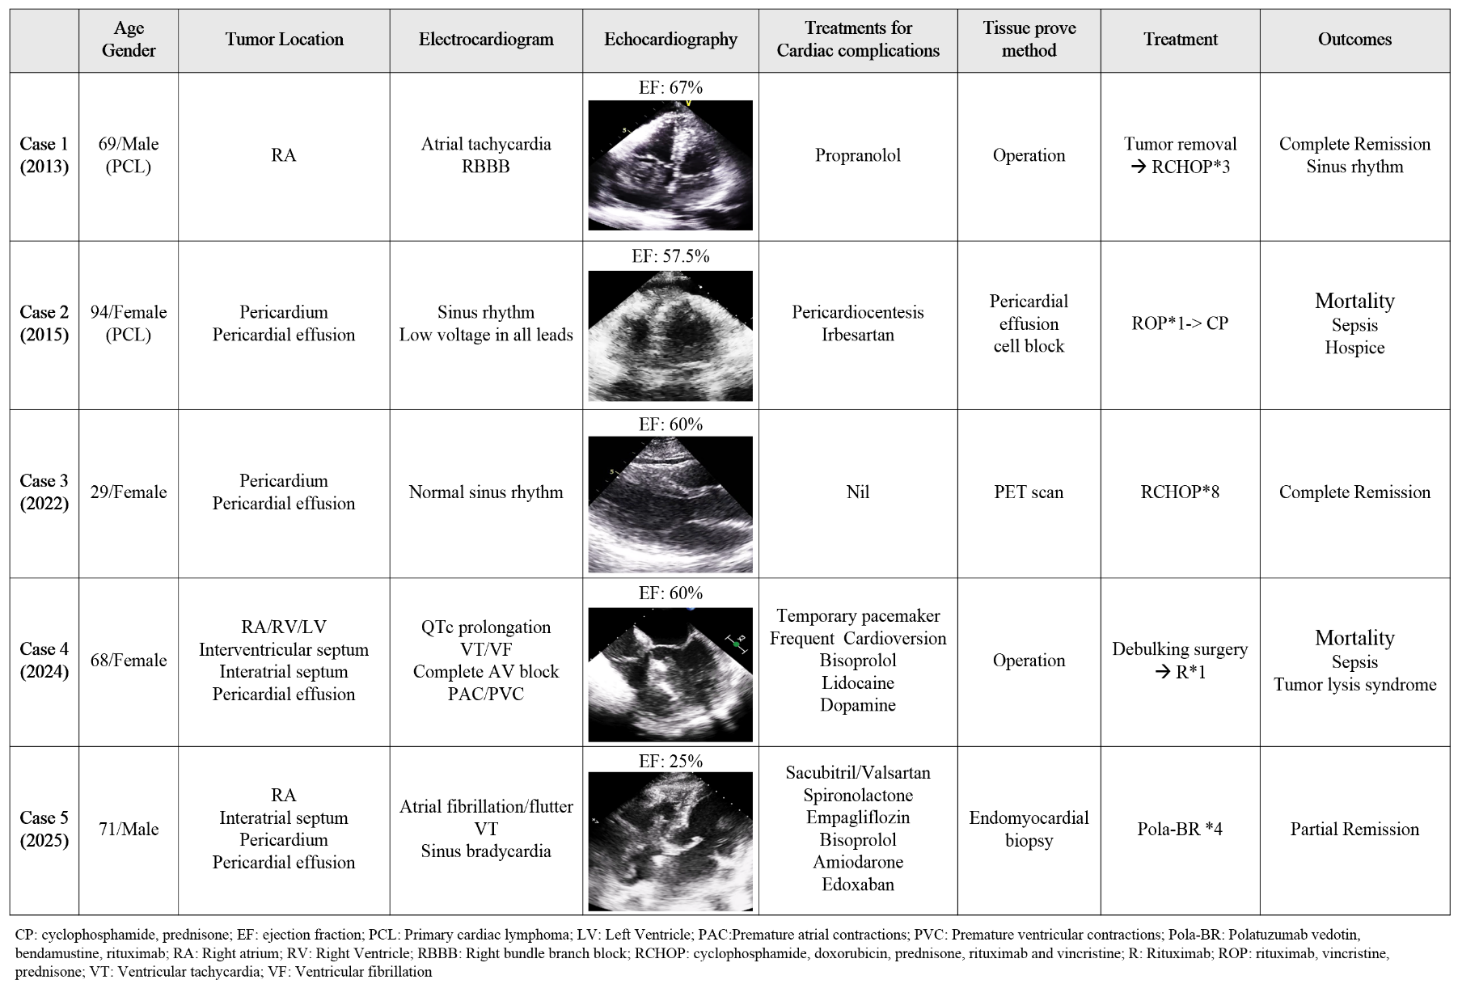

Supplement: Supplementary file 1 [file 2f99eb1b99cddcdd1e26977c.docx]
